# Supplementary material
Source: MDPI journal article supplement (https://www.mdpi.com/2076-3417/14/2/629)
Supplement: s1 [file s1]

**Table S1.** Uncertainty budget for the numerical calculation.

| Source of Uncertainty                          | Tolerance [dB] | Probability Distribution | Divisor | Sensitivity Factor $c_i$ | Standard Uncertainty [dB] |
|------------------------------------------------|----------------|--------------------------|---------|--------------------------|---------------------------|
| <b>3D SAR distribution calculation</b>         |                |                          |         |                          |                           |
| ABC                                            | 0.04           | N                        | 1       | 1                        | 0.04                      |
| Simulation Time                                | 0.02           | R                        | 1.73    | 1                        | 0.01                      |
| Grid Resolution                                | 0.12           | N                        | 1       | 1                        | 0.12                      |
| Volume Integral                                | 0.6            | N                        | 1       | 1                        | 0.60                      |
| Combined Standard Uncertainty                  |                |                          |         |                          | 0.61                      |
| <b>TF calculation</b>                          |                |                          |         |                          |                           |
| ABC                                            | 0.04           | N                        | 1       | 1                        | 0.04                      |
| Simulation Time                                | 0.02           | R                        | 1.73    | 1                        | 0.01                      |
| Grid Resolution                                | 0.12           | N                        | 1       | 1                        | 0.12                      |
| Placement of Excitation Source                 | 0.35           | R                        | 1.73    | 1                        | 0.20                      |
| Position of Calculation of Electrical Current  | 0.10           | R                        | 1.73    | 1                        | 0.06                      |
| Combined Standard Uncertainty                  |                |                          |         |                          | 0.25                      |
| <b><math>A_{ij}</math> factors calculation</b> |                |                          |         |                          |                           |
| ABC                                            | 0.04           | N                        | 1       | 1                        | 0.04                      |
| Simulation Time                                | 0.02           | R                        | 1.73    | 1                        | 0.01                      |
| Grid Resolution                                | 0.10           | N                        | 1       | 1                        | 0.10                      |
| Volume Integral                                | 0.55           | N                        | 1       | 1                        | 0.55                      |
| Combined Standard Uncertainty                  |                |                          |         |                          | 0.56                      |

**Table S2.** Combined uncertainty of the numerical calculation of the deposited power at a pair of leads.

| Source of Uncertainty               | Standard Uncertainty [dB] |
|-------------------------------------|---------------------------|
| 3D SAR distribution calculation     | 0.61                      |
| TF calculation                      | 0.25                      |
| $A_{ij}$ factors calculation        | 0.56                      |
| Combined standard uncertainty (k=1) | 0.86                      |
| Expanded uncertainty (k=2)          | 1.73                      |

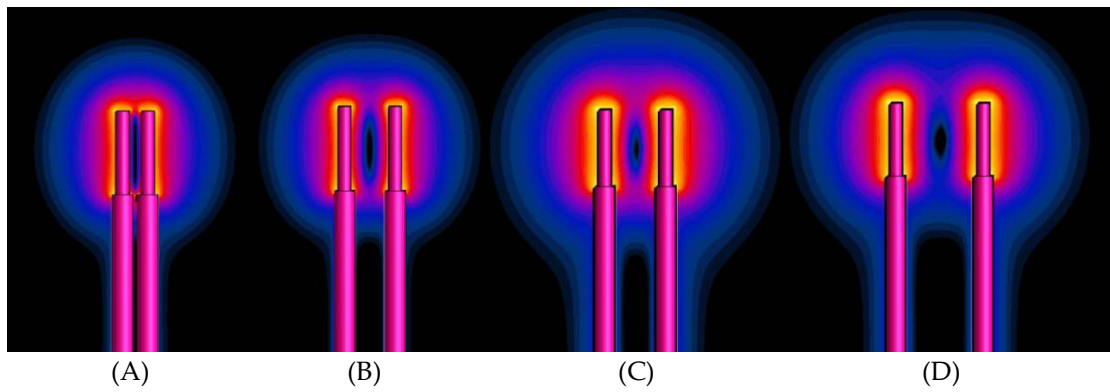

**Figure S1.** The SAR distribution at the tips of the pair of wires for  $l=0\text{mm}$  and (A)  $d=3\text{mm}$ , (B)  $d=6\text{mm}$ , (C)  $d=8\text{mm}$  and (D)  $d=12\text{mm}$  when they are excited by the electrical field shown in the first row of the Hadamard matrix.
